# Supplementary material for: Development of Pd/In2O3 hybrid nanoclusters to optimize ethanol vapor sensing
Source: Royal Society of Chemistry journal article supplement (doi:10.1039/d4cp00868e), 2024-01-01
Supplement: d4cp00868e1.pdf [file d4cp00868e1.pdf]

Supporting Information

# Development of Pd/In<sub>2</sub>O<sub>3</sub> Hybrid Nanoclusters to Optimize the Ethanol Vapor Sensing

Bo Xie,<sup>a</sup> Jian Sun,<sup>a</sup> Aoxue Zhang,<sup>a</sup> Haoyu Qian,<sup>a</sup> Xibing Mao,<sup>a</sup> Yingzhu Li,<sup>a</sup> Wenjing Yan,<sup>a</sup> Changjiang Zhou,<sup>a</sup> Hui-Min Wen,<sup>a</sup> Shengjie Xia,<sup>a</sup> Min Han<sup>b</sup>, Paolo Milani,<sup>c</sup> and Peng Mao<sup>\*, b, d</sup>

<sup>a</sup> College of Chemical Engineering, Zhejiang University of Technology, Zhejiang 310014, P. R. China

<sup>b</sup> National Laboratory of Solid State Microstructures, Nanjing University, Nanjing 210093, P. R. China

<sup>c</sup> CIMAINA and Department of Physics, Università degli Studi di Milano, via Celoria 16, I-20133, Milano, Italy

<sup>d</sup> State Key Laboratory of Fluid Power and Mechatronic Systems, Zhejiang University, Hangzhou. 310027, China.

\* Corresponding author; E-mail: pmao@nju.edu.cn

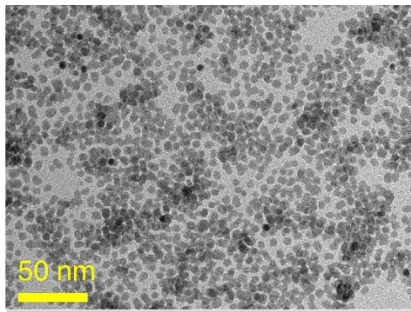

| Element | At. No. | Mass Norm. [%] | Atom [%]      | abs. error [%] (1 sigma) |
|---------|---------|----------------|---------------|--------------------------|
| Pd      | 46      | 4.49           | 2.15          | 0.46                     |
| In      | 49      | 75.23          | 33.34         | 3.24                     |
| O       | 8       | 20.28          | 64.51         | 0.68                     |
|         |         | <b>100.00</b>  | <b>100.00</b> |                          |

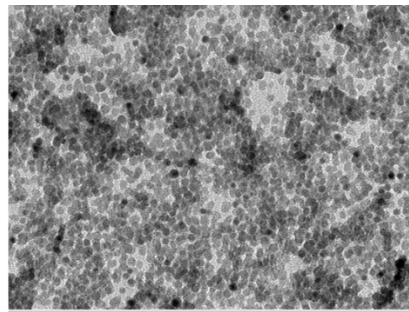

| Element | At. No. | Mass Norm. [%] | Atom [%]      | abs. error [%] (1 sigma) |
|---------|---------|----------------|---------------|--------------------------|
| Pd      | 46      | 12.09          | 6.46          | 0.72                     |
| In      | 49      | 71.58          | 35.47         | 2.93                     |
| O       | 8       | 16.33          | 58.07         | 0.55                     |
|         |         | <b>100.00</b>  | <b>100.00</b> |                          |

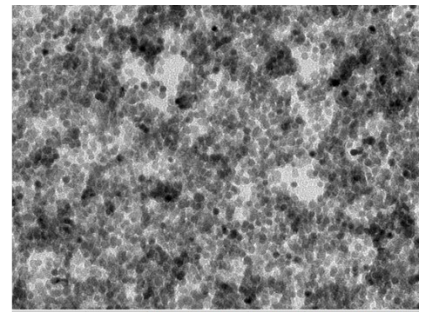

| Element | At. No. | Mass Norm. [%] | Atom [%]      | abs. error [%] (1 sigma) |
|---------|---------|----------------|---------------|--------------------------|
| Pd      | 46      | 21.68          | 11.54         | 1.05                     |
| In      | 49      | 61.98          | 30.58         | 2.62                     |
| O       | 8       | 16.34          | 57.88         | 0.55                     |
|         |         | <b>100.00</b>  | <b>100.00</b> |                          |

Figure S1 The TEM images and EDS elemental analysis results of the Pd/In<sub>2</sub>O<sub>3</sub> NC films with three different Pd loading amounts

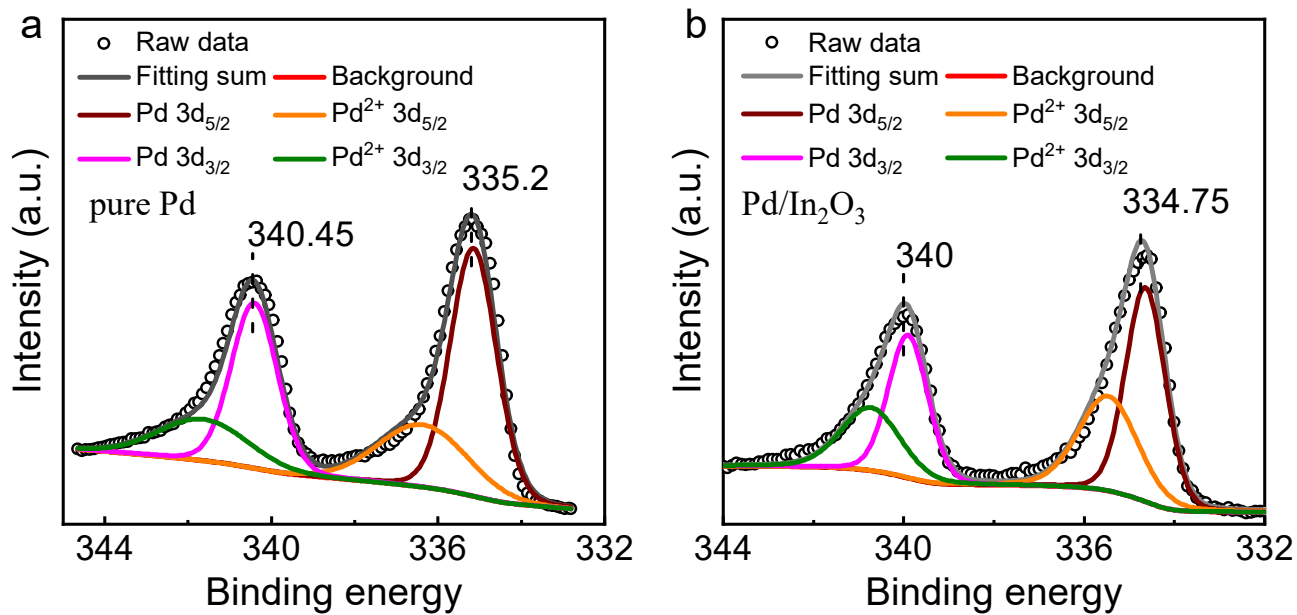

Figure 2. Pd 3d XPS spectra of (a) Pd and (b) Pd/In<sub>2</sub>O<sub>3</sub>.
